# Supplementary material for: Seminal-Plasma-Mediated Effects on Sperm Performance in Humans
Source: MDPI journal article supplement (doi:10.3390/cells11142147), 2022-07-08
Supplement: s1 [file s1]

**Supplement table S1.** Overall linear mixed model (LMM) statistics for the effect of treatment (control or SP) on VCL and generalized mixed model (GLMM) statistics for the effect of treatment (control or SP) on motility (proportion of motile sperm) and hyperactivation (proportion of hyperactivated sperm). All models included sub-sample, time point, treatment (SW vs. SP), and the interaction between time point and treatment as fixed factors; the random slope of time point for sperm donor, SP donor, and their interaction was included as random effects.

| Effects                             |          |      | VCL  |          |         | % of motile sperm |      |          | % of hyperactivated sperm |          |      |          |         |
|-------------------------------------|----------|------|------|----------|---------|-------------------|------|----------|---------------------------|----------|------|----------|---------|
| Random                              |          |      | d.f. | $\chi^2$ | $p$     |                   | d.f. | $\chi^2$ | $p$                       |          | d.f. | $\chi^2$ | $p$     |
| Time point   Sperm donor            |          |      | 2    | 28.78    | < 0.001 |                   | 3    | 188.35   | < 0.001                   |          | 3    | 74.56    | < 0.001 |
| Time point   SP donor               |          |      | 2    | 30.37    | < 0.001 |                   | 3    | 10.09    | 0.018                     |          | 3    | 58.67    | < 0.001 |
| Time point   Sperm donor x SP donor |          |      | 2    | 9.42     | 0.009   |                   | 3    | 10.86    | 0.013                     |          | 3    | 26.64    | < 0.001 |
| OLRE                                |          |      | -    | -        | -       |                   | 1    | 19.74    | < 0.001                   |          | 1    | 71.03    | < 0.001 |
| Fixed                               | Estimate | SD   | d.f. | t        | p       | Estimate          | SD   | z        | p                         | Estimate | SD   | z        | p       |
| Intercept                           | 79.57    | 5.17 | 13   | 15.39    | < 0.001 | -1.03             | 0.11 | -9.46    | < 0.001                   | -5.33    | 0.46 | -11.63   | < 0.001 |
| Sub-sample                          | -0.66    | 0.64 | 591  | -1.03    | 0.301   | -0.05             | 0.02 | -3.13    | 0.002                     | -0.05    | 0.09 | -0.57    | 0.571   |
| Time point                          | -13.16   | 2.52 | 14   | -5.22    | < 0.001 | -0.22             | 0.04 | -5.81    | < 0.001                   | -1.92    | 0.24 | -8.02    | < 0.001 |
| Treatment                           | 42.78    | 8.45 | 8    | 5.06     | < 0.001 | 0.19              | 0.05 | 4.02     | < 0.001                   | 2.83     | 0.93 | 3.07     | 0.002   |
| Time point x Treatment              | 16.42    | 5.58 | 8    | 2.94     | < 0.018 | 0.22              | 0.07 | 2.91     | 0.004                     | 2.04     | 0.29 | 6.97     | < 0.001 |

**Supplement table S2.** Ranges of measured sperm parameters at 30 min and 90 min time points in control and seminal plasma-treated samples. VCL = sperm swimming velocity.

| Time point | Treatment      | Sperm parameter              | Range        |
|------------|----------------|------------------------------|--------------|
| 30 min     | Control        | VCL ( $\mu\text{m s}^{-1}$ ) | 68.1 – 161.7 |
|            |                | Motility (%)                 | 16.2 – 76.0  |
|            |                | Hyperactivation (%)          | 0 – 30.3     |
|            | Seminal plasma | VCL ( $\mu\text{m s}^{-1}$ ) | 42.8 – 148.9 |
|            |                | Motility (%)                 | 10.9 – 70.7  |
|            |                | Hyperactivation (%)          | 0 – 16.2     |
| 90 min     | Control        | VCL ( $\mu\text{m s}^{-1}$ ) | 64.2 – 172.5 |
|            |                | Motility (%)                 | 13.6 – 70.5  |
|            |                | Hyperactivation (%)          | 0 – 38.3     |
|            |                | Viability (%)                | 61.3 – 82.3  |
|            | Seminal plasma | VCL ( $\mu\text{m s}^{-1}$ ) | 10.9 – 103.3 |
|            |                | Motility (%)                 | 0.9 – 62.5   |
|            |                | Hyperactivation (%)          | 0 – 4.1      |
|            |                | Viability (%)                | 66.7 – 86.8  |

**Supplement table S3.** Overall linear mixed model (LMM) statistics for sperm curvilinear swimming velocity (VCL) and overall generalized mixed model (GLMM) statistics for motility (proportion of motile sperm) and hyperactivation (proportion of hyperactivated sperm) when considering different SP treatments. All models included sub-sample, timepoint, treatment (own or foreign SP) and its interaction with time point as fixed factors; the random slope of time point for sperm donor, SP donor, and sperm donor-SP donor interaction (random effects).

| Effects                             |          |      | VCL  |          |         | % of motile sperm |          |         | % of hyperactivated sperm |          |         |         |         |
|-------------------------------------|----------|------|------|----------|---------|-------------------|----------|---------|---------------------------|----------|---------|---------|---------|
| Random                              |          |      | d.f. | $\chi^2$ | p       | d.f.              | $\chi^2$ | p       | d.f.                      | $\chi^2$ | p       |         |         |
| Time point   Sperm donor            |          |      | 2    | 43.35    | < 0.001 | 3                 | 168.94   | < 0.001 | 3                         | 71.60    | < 0.001 |         |         |
| Time point   SP donor               |          |      | 2    | 37.28    | < 0.001 | 3                 | 4.12     | 0.030   | 3                         | 59.76    | < 0.001 |         |         |
| Time point   Sperm donor x SP donor |          |      | 2    | 1.982    | 0.371   | 3                 | 8.98     | 0.013   | 3                         | 2.66     | 0.448   |         |         |
| 1   OLRE                            |          |      | -    | -        | -       | 1                 | 11.8     | < 0.001 | 1                         | 17.92    | < 0.001 |         |         |
| Fixed                               | Estimate | SD   | d.f. | t        | p       | Estimate          | SD       | z       | p                         | Estimate | SD      | z       | p       |
| Intercept                           | 80.03    | 5.09 | 13   | 15.72    | < 0.001 | - 1.03            | 0.11     | - 9.36  | < 0.001                   | - 5.36   | 0.53    | - 10.08 | < 0.001 |
| Sub-sample                          | -1.43    | 0.61 | 533  | -2.35    | 0.019   | - 0.06            | 0.02     | - 3.43  | 0.001                     | - 0.17   | 0.12    | - 1.41  | 0.159   |
| Time point                          | -13.22   | 2.75 | 14   | -4.81    | < 0.001 | - 0.23            | 0.04     | - 5.70  | < 0.001                   | - 2.24   | 0.33    | - 6.77  | < 0.001 |
| Treatment                           | 0.05     | 1.71 | 77   | 0.03     | 0.973   | -0.02             | 0.04     | -0.63   | 0.532                     | -0.11    | 0.22    | -0.51   | 0.613   |
| Treatment x Time point              | 1.08     | 1.97 | 270  | 0.55     | 0.583   | 0.14              | 0.06     | 2.42    | 0.016                     | 0.96     | 0.45    | 2.13    | 0.033   |

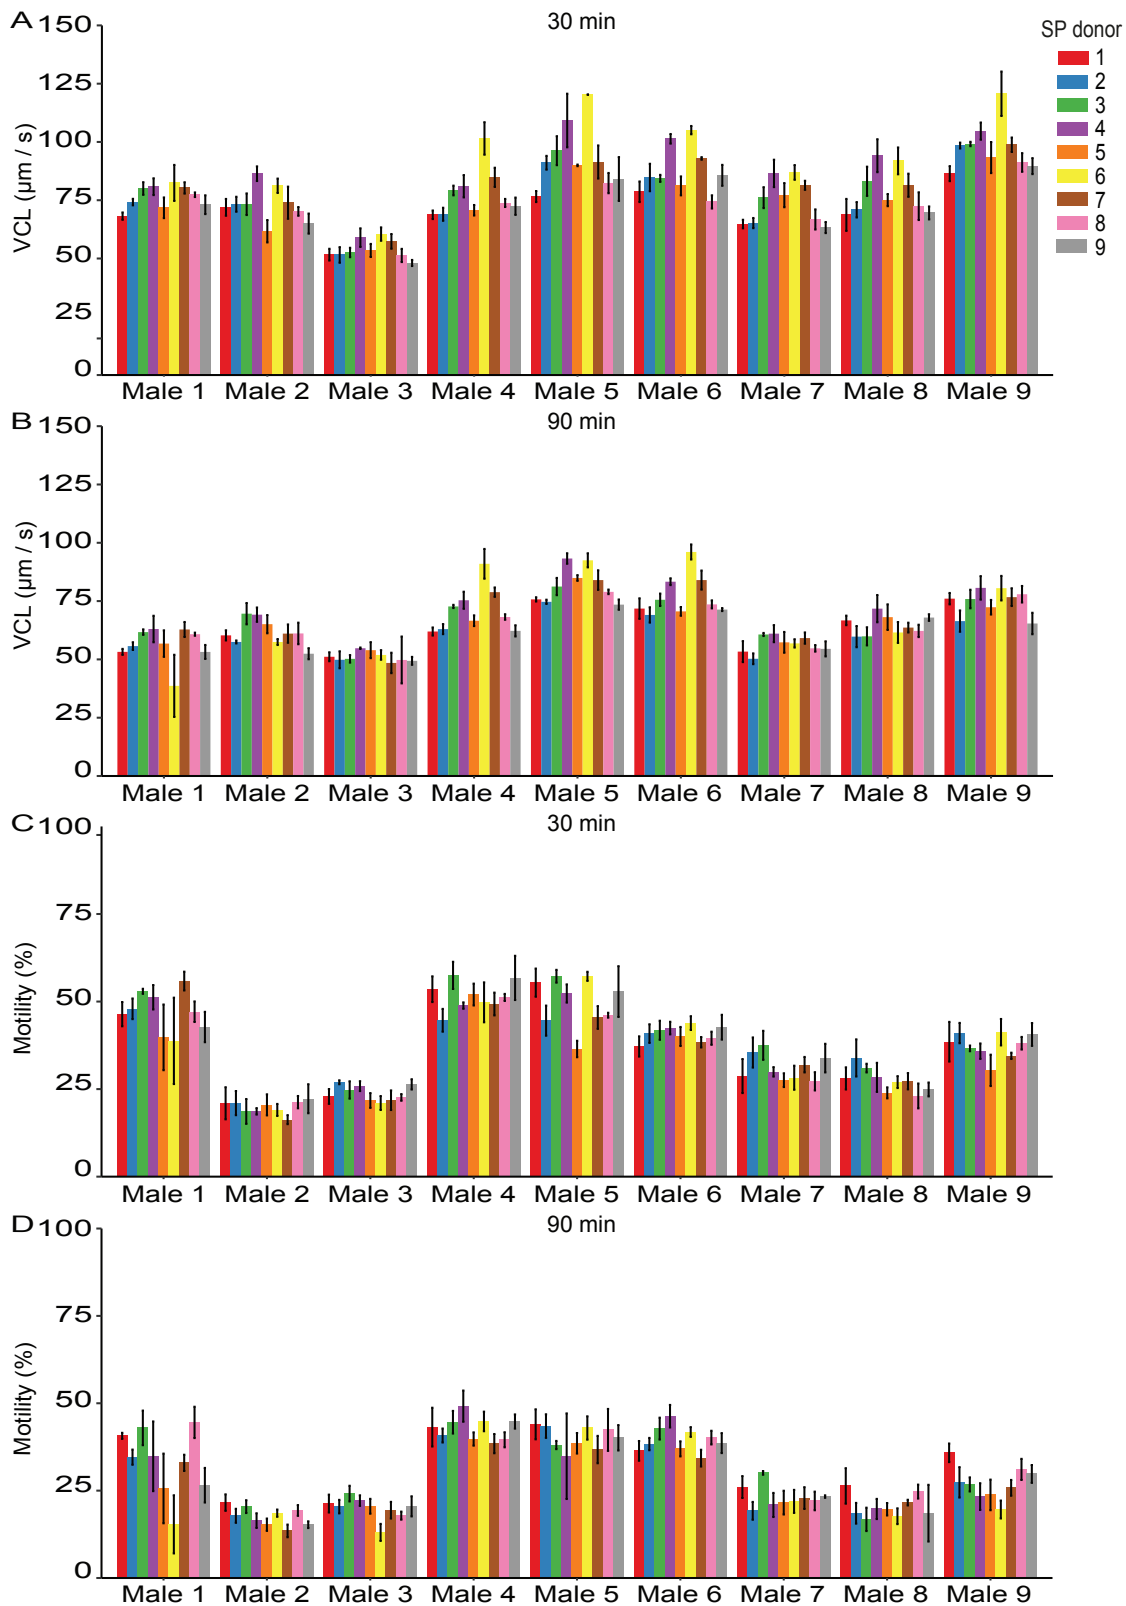

**Supplement figure S1.** Sperm parameters in SP-treated samples 30 min and 90 min after the treatments: sperm swimming velocity (VCL) at 30min (A), VCL at 90 min (B), proportion of motile sperm at 30 min (C) and proportion of motile sperm at 90min (D). Each male (1-9) is represented in separate panels and the SP donor identities are indicated by different colors. Error bars show standard error of mean (SEM).

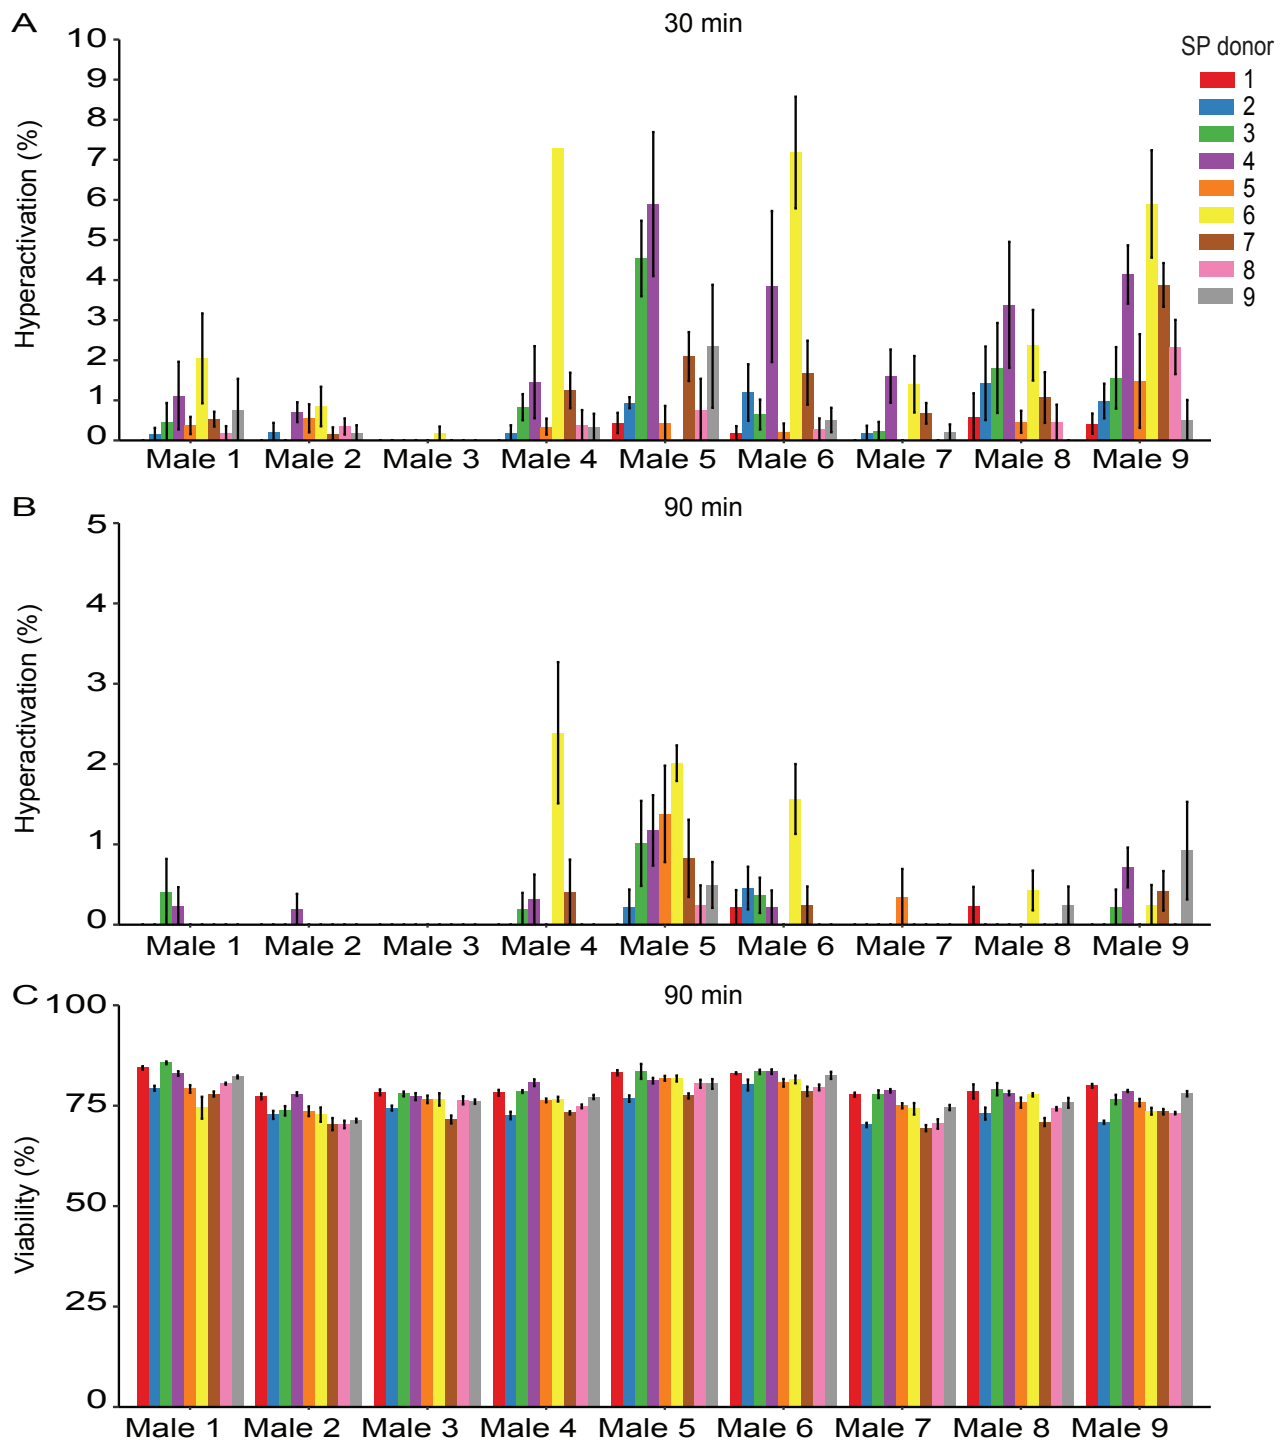

**Supplement figure S2.** Sperm parameters in SP-treated samples 30 min and 90 min after the treatments: the proportion of hyperactivated sperm at 30min (**A**), at 90 min (**B**) and sperm viability at 90 min (**C**). Each male (1-9) is represented in separate panels and the SP donor identities are indicated by different colors. Error bars show standard error of mean (SEM).
